# Supplementary material for: Role of Nse1 Subunit of SMC5/6 Complex as a Ubiquitin Ligase
Source: MDPI journal article supplement (doi:10.3390/cells11010165), 2022-01-04
Supplement: s1 [file s1]

## Supplementary Information

Role of Nse1 subunit of SMC5/6 complex as a ubiquitin ligase

Peter Kolesar, Karel Stejskal, David Potesil, Johanne M. Murray and Jan J. Palecek

**Table S1.** Oligonucleotides used in this study.

| oligonucleotide |                   | sequence 5' to 3'                                        |
|-----------------|-------------------|----------------------------------------------------------|
| oPK154          | Ubc7-F            | cgcgcgccagccatagtagtaaagctatggcgttgc                     |
| oPK155          | Ubc7-R            | gtcatgctagccatattataatcccaagggtttacgagc                  |
| KB22            | Nse1-R            | gaggagaagccccgggtgctgacttaccagcgtcctataacggctgc          |
| KB178           | Nse1-F            | agccaggatccggcgaaaacctgtatttcagggcatggagaaagagagacaag    |
| MP011           | NSE1-97-F         | ctgcatatggccatgggtgttcagatagaacttatgagaaagataatcga       |
| MP014           | NSE1-178-R        | gcaggctgcacggatcctactcgtattcgttgtgtaaataagcat            |
| oPK586          | Ub-F              | cagattacgctcatatgcaaatttcgtcaaaaccc                      |
| oPK588          | Ub-R              | gcctccatggccatcaaccaccacgaagacg                          |
| oPK62           | Nse1-HBH-F        | taacacgcatggcgaaatgcgaccttataggacgctggcgatccccgggtaattaa |
| oPK63           | Nse1-HBH-R        | aaacaagtaaagcgaacaccagtaggtagtgaataattagaattcagctcgtttaa |
| oPK68           | Nse4-139-F        | ggagagttgtgcttaaaggtg                                    |
| oPK192          | Nse4+375-R        | taatctaatacctcctcgttgc                                   |
| oPK195          | G418-F            | taacaagaagagatcagcttgctcgtccccg                          |
| oPK196          | G418-R            | ttattgaatcagatctactggatggcggttag                         |
| oPK30           | Nse1-C184*-F      | cgaatacagagcaatttatacgaatagaacgcttgcgcga                 |
| oPK31           | Nse1-C184*-R      | tcgcgacaagcgttctattcgtataaattgctctcgtattcg               |
| oPK32           | Nse1-L203,V205A-F | gctaaatgcttgcaacagtaagcatgcgcgcagtagccacaatcacatac       |
| oPK33           | Nse1-L203,V205A-R | gtatgtgattgtggctactgcgcgcagcttactgttgcaagcatttagc        |
| oPK44           | Nse1-R188A-F      | caatttatacgaatgcaacgcttgtgccgaaattgtaattgctgga           |
| oPK45           | Nse1-R188A-R      | tccagcaattacaatttcggcacaagcgttgcatcgtataaattg            |
| oPK46           | Nse1-R188E-F      | caatttatacgaatgcaacgcttgtgaggaaattgtaattgctgga           |
| oPK47           | Nse1-R188E-R      | tccagcaattacaatttcctcacaagcgttgcatcgtataaattg            |
| oPK48           | Nse1-L211A-F      | ctgcttgcatgttactgttgcaagcatgcagctcatgttaattgtataa        |
| oPK49           | Nse1-L211A-R      | ttatacaattaacatgagctgcatgcttgcaacagtaaacatgcaagcag       |
| JP903           | Nse1-C216S-F      | gcatttagctcatgttaatagtataaattgtaacacgcc                  |
| JP904           | Nse1-C216S-R      | ggcgtgttacaatttatactattaacatgagctaaatgc                  |
| oPK92           | Nse4-K181R-F      | cccaagaaaataacaccactagaaatgtcttgacatatctcg               |
| oPK93           | Nse4-K181R-R      | cgagatatgtgcaagacatttctagtgggtgttatttcttggg              |

**Table S2.** *S. pombe* strains used in this study.

| strain #   | genotype                                                                   | source          |
|------------|----------------------------------------------------------------------------|-----------------|
| AMC503     | <i>ade6-704 leu1-32 ura4-D18 h+</i>                                        | A. M. Carr      |
| yPK2       | <i>nse1-HBH::Ura4 ade6-704 leu1-32 ura4-D18 h+</i>                         | This study      |
| YJP101     | <i>nse1-WT::Ura4 ade6-704 leu1-32 ura4-D18 h-</i>                          | This study      |
| yPK1       | <i>nse1-R188E::Ura4 ade6-704 leu1-32 ura4-D18 h+</i>                       | This study      |
| JMM2050    | <i>nse2-SA::Ura4 ade6-704 leu1-32 ura4-D18 h-</i>                          | J. M. Murray    |
| yPK60-1B   | <i>nse2-SA::Ura4 nse1-R188E::Ura4 ade6-704 leu1-32 ura4-D18 h+</i>         | This study      |
| YHS45      | <i>nse1-C216S::Ura4 ade6-704 leu1-32 ura4-D18 h-</i>                       | This study      |
| yPK180     | <i>nse1-R188E C216S::Ura4 ade6-704 leu1-32 ura4-D18 h-</i>                 | This study      |
| JMM956     | <i>smc6-74 ade6-704 leu1-32 ura4-D18 h+</i>                                | J. M. Murray    |
| JMM1920    | <i>smc6-X ade6-704 leu1-32 ura4-D18 h-</i>                                 | J. M. Murray    |
| NBY835     | <i>nse6::kanMX6 leu1-32 ura4-D18 h+</i>                                    | M. N. Boddy     |
| yPK208     | <i>nse4-K181R-KanMX6 ade6-704 leu1-32 ura4-D18 h+</i>                      | This study      |
| yPK213-2C  | <i>smc6-X nse4-K181R-KanMX6 ade6-704 leu1-32 ura4-D18 h+</i>               | This study      |
| yPK229-11B | <i>smc6-74 nse4-K181R-KanMX6 ade6-704 leu1-32 ura4-D18 h-</i>              | This study      |
| MA23       | <i>nse3-R254E::Lox ade6-704 leu1-32 ura4-D18 h+</i>                        | K. Zabradý      |
| yPK228-5D  | <i>nse3-R254E::Lox nse4-K181R-KanMX6 ade6-704 leu1-32 ura4-D18 h-</i>      | This study      |
| yPK231-3C  | <i>nse1-R188E::Ura4 nse4-K181R-KanMX6 ade6-704 leu1-32 ura4-D18 h+</i>     | This study      |
| yPK200     | <i>ubc13::KanMX6 ade6-704 leu1-32 ura4-D18 h+</i>                          | Bioneer library |
| yPK291-2A  | <i>nse4-K181R-KanMX6 ubc13::KanMX6 ade6-704 leu1-32 ura4-D18 h+</i>        | This study      |
| yPK219-3C  | <i>smc6-X ubc13::KanMX6 ade6-704 leu1-32 ura4-D18 h+</i>                   | This study      |
| yPK242-9B  | <i>smc6-X ubc13::KanMX6 nse4-K181R-KanMX6 ade6-704 leu1-32 ura4-D18 h+</i> | This study      |
| yPK238-4C  | <i>nse6::kanMX6 nse4-K181R-KanMX6 ade6-704 leu1-32 ura4-D18 h+</i>         | This study      |
| yPK43      | <i>ubc7::kanMX6 ade6-704 leu1-32 ura4-D18 h+</i>                           | Bioneer library |
| yPK292-6C  | <i>nse4-K181R-KanMX6 ubc7::kanMX6 ade6-704 leu1-32 ura4-D18 h+</i>         | This study      |
| yPK292-1B  | <i>smc6-X ubc7::kanMX6 ade6-704 leu1-32 ura4-D18 h+</i>                    | This study      |
| yPK292-6A  | <i>smc6-X nse4-K181R-KanMX6 ubc7::kanMX6 ade6-704 leu1-32 ura4-D18 h+</i>  | This study      |

**Supplementary Figures:**

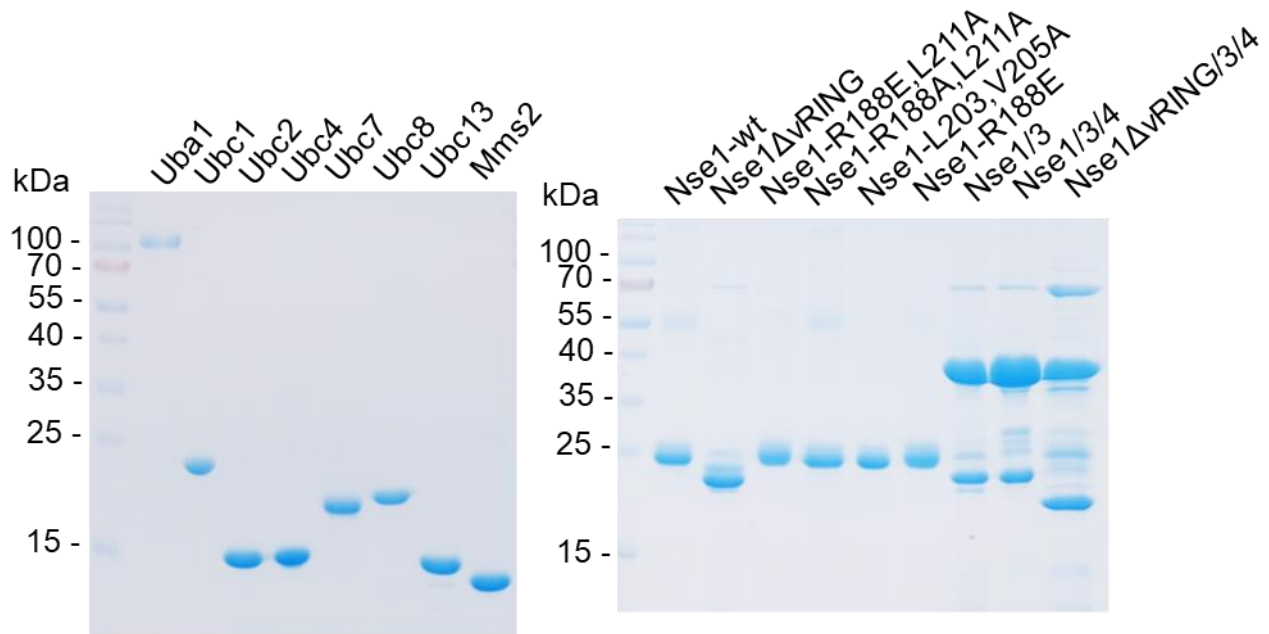

**Figure S1.** Proteins purified in this study. Indicated proteins were resolved by 12% SDS-PAGE and stained with Coomassie blue dye. Numbers on the left indicate molecular weights of protein standards (in kDa).

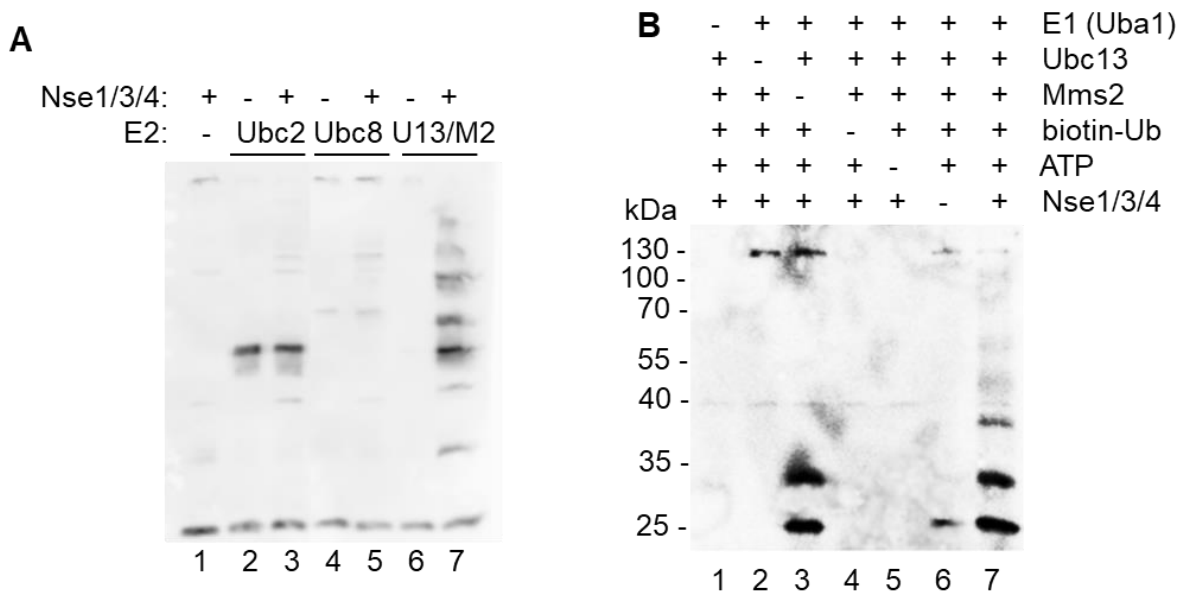

**Figure S2.** Nse1 promotes in vitro ubiquitination specifically with Ubc13/Mms2. **(A)** Nse1 does not stimulate ubiquitin chain formation when combined with Ubc2 or Ubc8. *S. pombe* E1 (Uba1), indicated E2s, biotinylated ubiquitin, ATP, and MgCl<sub>2</sub> were incubated in the presence or absence of Nse1/3/4 trimer for 1h at 37°C. The mixture was analyzed by 12% SDS-PAGE followed by western-blotting and visualization of biotinylated ubiquitin using Streptavidin-HRP. **(B)** Omission of E1, Ubc13, ubiquitin or ATP disrupts ubiquitin conjugate formation. The indicated proteins were mixed and analyzed as in (A).

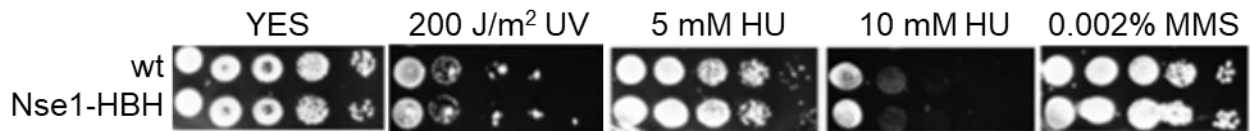

**Figure S3.** The HBH tag of the *Nse1-HBH* strain does not affect yeast cell growth or DNA-damage sensitivity. The *wild-type* and *Nse1-HBH* strains were grown to  $OD_{600} \sim 1$ , tenfold serially diluted, spotted onto rich media with the indicated amounts of HU, MMS or UV dose, and incubated at 28 °C for 3 days.

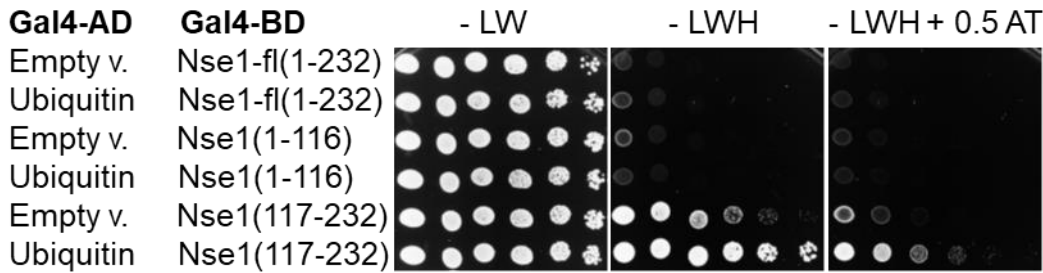

**Figure S4.** The C-terminal part of Nse1 interacts with ubiquitin in the yeast two-hybrid assay. Plasmids carrying indicated genes or corresponding empty vectors were co-transformed into the *S. cerevisiae* PJ69–4a strain, grown to  $OD_{600} \sim 1$ , fivefold serially diluted and spotted on solid media lacking leucine (L), tryptophan (W), histidine (H), in absence or presence of 0.5 mM 3-aminotriazole (0.5 AT) as depicted. Cells were grown for 3 days at 30 °C and scanned.

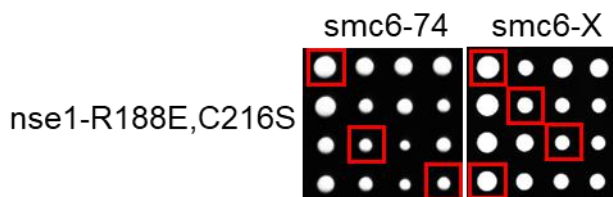

**Figure S5.** The synthetic lethality and growth defect observed in the *smc6-74 nse1-R188E* and *smc6-X nse1-R188E* strains, respectively, are suppressed by the *nse1-C216S* mutation. Tetrad dissection analysis of *S. pombe* diploid strains resulted from crosses between the *nse1-R188E-C216S* strain and *smc6-74* or *smc6-X*. Red rectangles mark triple mutants.

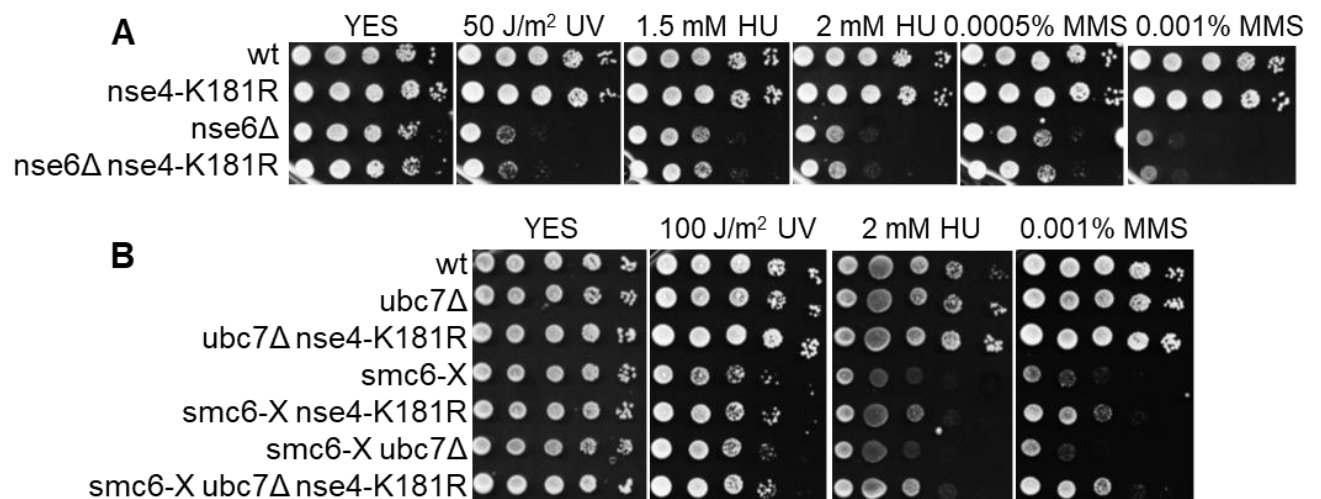

**Figure S6.** *Nse4-K181R* does not suppress the sensitivity of *nse6Δ*, but suppresses *smc6-X* in the absence of *Ubc7*. (A) *Nse4-K181R* does not suppress the sensitivity of *nse6Δ* to DNA-damaging agents. (B) *Nse4-K181R* suppresses the *smc6-X* sensitivity also in the absence of *Ubc7*. The depicted strains were grown to OD<sub>600</sub> ~ 1, tenfold serially diluted, spotted onto rich media with the indicated amounts of HU, MMS or UV dose, and incubated at 28 °C for 3 days.

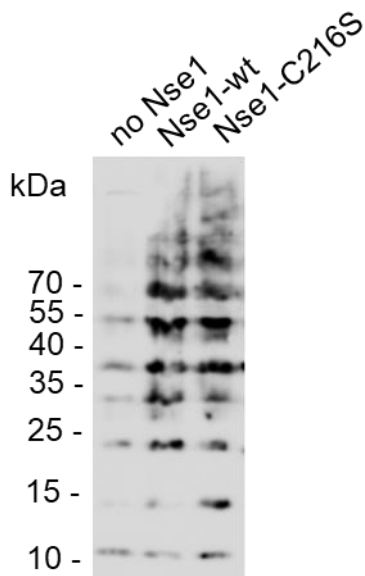

**Figure S7.** The C216S mutation does not inhibit Nse1 ubiquitin ligase activity. E1, Ubc13/Mms2 and biotinylated ubiquitin were incubated with ATP and MgCl<sub>2</sub> in the absence or presence of Nse1 or its C216S mutant for 1h at 37°C. The mixture was analyzed by 12% SDS-PAGE followed by western-blotting and visualization of biotinylated ubiquitin using Streptavidin-HRP.
